# Supplementary material for: Trends in Electronic Health Record Inbox Messaging During the COVID-19 Pandemic in an Ambulatory Practice Network in New England
Source: PubMed Central journal article supplement (PMC8511977; doi:10.1001/jamanetworkopen.2021.31490), 2021-10-12
Supplement: jamanetwopen-e2131490-s001.pdf [file jamanetwopen-e2131490-s001.pdf]

## Supplemental Online Content

Nath B, Williams B, Jeffery MM, et al. Trends in electronic health record inbox messaging during the COVID-19 pandemic in an ambulatory practice network in New England. *JAMA Netw Open*. 2021;4(10):e2131490. doi:10.1001/jamanetworkopen.2021.31490

**eTable 1.** Epic Inbox Message Categories

**eTable 2.** Physician Specialty Grouping

This supplemental material has been provided by the authors to give readers additional information about their work.

**eTable 1. Epic Inbox Message Categories**

| Epic Inbox Message Categories            | Message Categories by Source of Origin |
|------------------------------------------|----------------------------------------|
| Clinical Update Message                  | Patient Originated Messages            |
| MyChart Patient Entered FlowsheetMessage |                                        |
| Patient Call Back                        |                                        |
| Patient Calls                            |                                        |
| Patient CRM Request                      |                                        |
| Patient History QuestionnaireSubmission  |                                        |
| Patient Medical Advice Request           |                                        |
| Patient Questionnaire Submission         |                                        |
| Patient Refill Request                   |                                        |
| Patient Schedule Request                 |                                        |
| Rx Auth                                  | Prescription Renewal                   |
| Patient Reminder                         | Physician User Initiated               |
| Results                                  |                                        |
| AC SIGNIFICANT WEIGHTCHANGE              | System Generated                       |
| Anticoagulation Enrollment               |                                        |
| BestPractice                             |                                        |
| Broadcast Message                        |                                        |
| Canceled Orders                          |                                        |
| Cardiology Message                       |                                        |
| Case Message                             |                                        |
| CE Event Notification                    |                                        |
| Charts                                   |                                        |
| Clinical Letter                          |                                        |
| Coding Query                             |                                        |
| Completed Orders                         |                                        |
| Covered Work                             |                                        |
| E-Consult                                |                                        |
| ED Charting Reminder                     |                                        |
| Encounter Report                         |                                        |
| E-Prescribing Errors                     |                                        |
| Follow-up Reminder                       |                                        |
| Help Desk                                |                                        |
| Home Health Discharge                    |                                        |
| Hospital ADT                             |                                        |
| Hospital Chart Completion                |                                        |
| ID Chart Correction Message              |                                        |

|                                     |  |                       |
|-------------------------------------|--|-----------------------|
| Incomplete Note                     |  |                       |
| Initiate Call Back                  |  |                       |
| INR Reminder                        |  |                       |
| IP Cosign Note                      |  |                       |
| IP ROUTING                          |  |                       |
| Letter Queue                        |  |                       |
| Media Manager                       |  |                       |
| Medication Cancellation             |  |                       |
| Open Encounters                     |  |                       |
| Open Letters                        |  |                       |
| Overdue Message                     |  |                       |
| Overdue Rslt                        |  |                       |
| Overdue Rx Auth                     |  |                       |
| Post Mortem Notification            |  |                       |
| Radiology Messages                  |  |                       |
| Refill Errors                       |  |                       |
| Rejected Transcription              |  |                       |
| Reporting Workbench                 |  |                       |
| REVIEW REPORTS                      |  |                       |
| Route Plan                          |  |                       |
| Timeout Message                     |  |                       |
| Transcription                       |  |                       |
| Treatment Summary                   |  |                       |
| Unread Patient Message Notification |  |                       |
| Unsigned Orders                     |  |                       |
| Work Queue Message                  |  |                       |
| Addendum                            |  | Team Member Generated |
| CC Charts                           |  |                       |
| CE Outside Messages                 |  |                       |
| Chart Cosign                        |  |                       |
| Cosign - Clinic Orders              |  |                       |
| Lab Add-ons                         |  |                       |
| Referral Letter Review              |  |                       |
| Referral Message                    |  |                       |
| Referral Notification Letter        |  |                       |
| Result Notes                        |  |                       |
| Rx Response                         |  |                       |
| Staff Message                       |  |                       |

**eTable 2. Physician Specialty Grouping**

| <b>Physician Specialty</b>                       | <b>Combined Category</b> |
|--------------------------------------------------|--------------------------|
| Family Medicine                                  | Primary Care             |
| Geriatrics                                       |                          |
| Internal Medicine                                |                          |
| Neonatal-Perinatal Medicine (part of Pediatrics) |                          |
| Pediatrics                                       |                          |
| Allergy                                          | Medical Specialty        |
| Cardiovascular Disease                           |                          |
| Child & Adolescent Psychiatry                    |                          |
| Dermatology                                      |                          |
| Developmental-Behavioral Pediatrics              |                          |
| Endocrinology, Diabetes & Metabolism             |                          |
| Gastroenterology                                 |                          |
| Infectious Diseases                              |                          |
| Nephrology                                       |                          |
| Neurology                                        |                          |
| Otolaryngology                                   |                          |
| Pain Medicine                                    |                          |
| Palliative Care                                  |                          |
| Physical Medicine and Rehabilitation             |                          |
| Physician Assistant                              |                          |
| Psychiatry                                       |                          |
| Psychiatry & Neurology                           |                          |
| Pulmonary Critical Care Medicine                 |                          |
| Pulmonary Disease                                |                          |
| Rheumatology                                     |                          |
| Sleep Medicine                                   |                          |
| Colon & Rectal Surgery                           | Surgical Specialties     |
| Foot & Ankle Surgery                             |                          |
| Gynecology                                       |                          |
| Obstetrics and Gynecology                        |                          |
| Ophthalmology                                    |                          |
| Orthopedic Surgery                               |                          |
| Podiatry                                         |                          |
| Surgery                                          |                          |
| Urology                                          |                          |
